# Supplementary material for: Additive-free selective oxidation of aromatic alcohols with molecular oxygen catalyzed by a mixed-valence polyoxovanadate-based metal–organic framework
Source: Royal Society of Chemistry journal article supplement (doi:10.1039/d3dt01403g), 2023-01-01
Supplement: d3dt01403g1.pdf [file d3dt01403g1.pdf]

## Supporting Information

# Additive-free selective oxidation of aromatic alcohols with molecular oxygen catalyzed by a mixed-valence polyoxovanadate-based metal–organic framework

Hongrui Tian,<sup>†, a</sup> Runhan Li,<sup>†, b</sup> Jun Miao,<sup>a</sup> Shuxia Liu,<sup>c</sup> Fengfeng Wang<sup>d</sup> & Zhiping Zheng<sup>\*, a</sup>

<sup>a</sup> Department of Chemistry and Shenzhen Grubbs Institute, Southern University of Science and Technology, Shenzhen, Guangdong 518055, China.

<sup>b</sup> School of Chemistry, South China Normal University, Guangzhou, Guangdong 510006, China

<sup>c</sup> Key Laboratory of Polyoxometalate and Reticular Material Chemistry of Ministry of Education, College of Chemistry, Northeast Normal University, Ren Min Street No. 5268, Changchun, Jilin 130024, P. R. China

<sup>d</sup> National Institutes for Food and Drug Control, 31 Huatuo Road, Daxing District, Beijing, 102600, China.

*Corresponding author\* E-mail: [zhengzp@sustech.edu.cn](mailto:zhengzp@sustech.edu.cn)*

<sup>†</sup> These authors contributed equally.

## Table of Contents

|                                                                                                                                                                                                                                                                  |     |
|------------------------------------------------------------------------------------------------------------------------------------------------------------------------------------------------------------------------------------------------------------------|-----|
| 1. Computational details.....                                                                                                                                                                                                                                    | S3  |
| 2. Crystallographic data and structure refinements.....                                                                                                                                                                                                          | S5  |
| 3. PXRD patterns of V-Cd-MOF .....                                                                                                                                                                                                                               | S6  |
| 4. FTIR spectrum of V-Cd-MOF .....                                                                                                                                                                                                                               | S6  |
| 5. TGA curve of V-Cd-MOF .....                                                                                                                                                                                                                                   | S7  |
| 6. The PXRD patterns of the V-Cd-MOF samples recovered after solvent immersion.....                                                                                                                                                                              | S7  |
| 7. Protonated ligand [H <sub>2</sub> bix] <sup>2+</sup> in the V-Cd-MOF.....                                                                                                                                                                                     | S8  |
| 8. The N <sub>2</sub> adsorption / desorption isotherms of V-Cd-MOF.....                                                                                                                                                                                         | S8  |
| 9. The hydrogen bonds in the V-Cd-MOF .....                                                                                                                                                                                                                      | S9  |
| 10. BVS results.....                                                                                                                                                                                                                                             | S9  |
| 11. XPS spectra of V and Cd in V-Cd-MOF .....                                                                                                                                                                                                                    | S10 |
| 12. TEM image of the ground V-Cd-MOF.....                                                                                                                                                                                                                        | S10 |
| 13. The influences of reaction conditions on the selective oxidation of BA to BAD.....                                                                                                                                                                           | S11 |
| 14. The solvent effect on the selective oxidation of BA to BAD .....                                                                                                                                                                                             | S12 |
| 15. FTIR spectra and PXRD patterns of recovered V-Cd-MOF .....                                                                                                                                                                                                   | S12 |
| 16. XPS spectra of recovered V-Cd-MOF .....                                                                                                                                                                                                                      | S13 |
| 17. Comparison of different heterogeneous catalysts used for BA oxidation .....                                                                                                                                                                                  | S14 |
| 18. The coordination mode of Cd in Cd(Inic) <sub>2</sub> and the PXRD patterns of Cd(Inic) <sub>2</sub> ·0.5 DMF ....                                                                                                                                            | S15 |
| 19. The structure of {V <sup>IV</sup> <sub>16</sub> V <sup>V</sup> <sub>18</sub> O <sub>82</sub> } <sup>10-</sup> and the PXRD patterns of K <sub>10</sub> {V <sup>IV</sup> <sub>16</sub> V <sup>V</sup> <sub>18</sub> O <sub>82</sub> }·20H <sub>2</sub> O .... | S15 |
| 20. The structure of {V <sub>16</sub> }-MOF and the PXRD patterns of the {V <sub>16</sub> }-MOF .....                                                                                                                                                            | S16 |
| 21. Structures of open-shell singlet and nonet {V <sub>15</sub> } clusters .....                                                                                                                                                                                 | S16 |
| 22. Assessing the possible conformation of a {V <sub>15</sub> }-bound BA molecule.....                                                                                                                                                                           | S17 |
| 23. <sup>1</sup> H-NMR spectra of the isolated aldehydes.....                                                                                                                                                                                                    | S18 |
| 24. Selected bond lengths [Å] and angles [deg] for V-Cd-MOF .....                                                                                                                                                                                                | S24 |
| 25. References.....                                                                                                                                                                                                                                              | S26 |

## 1. Computational details

### Methods

All of the potential energy surface calculations were performed with (U)B3LYP-D3(BJ) functional. Full ground-state geometry optimizations were carried out at the SMD(acetonitrile)/(U)B3LYP-D3/Def2-SVP<sup>1</sup> level. Frequencies were calculated at the same theoretical level to verify the stationary points to be equilibriums or be transition states. Intrinsic reaction coordinate<sup>2</sup> (IRC) calculations were carried out to ensure the correct transition states connecting reactants and products. A better basis set system was employed to evaluate the single-point energy at the the SMD(acetonitrile)/(U)B3LYP-D3/Def2-TZVP<sup>3</sup> level, and combined it with the gas phase Gibbs free energy corrected by the thermodynamic energy (see below) to assess the free energy at 393.15 K and 0.8 Mpa in this work. All of the above calculations were performed with Gaussian 09 program.

### Correction of translational entropy in solution

We evaluated the electronic energy ( $E_{sol}$ ) with zero-point energy correction in solution. For each species, the  $E_{sol}$  is defined through equation:

$$E_{sol} = E_{sol}^{pot} + E_{gas}^{v_0}$$

where  $E_{sol}^{pot}$  is the potential energy including non-electrostatic energy in solution and  $E_{gas}^{v_0}$  represents the zero-point vibrational energy in the gas phase. In a bimolecular

process, such as the radical capture or dissociation, the entropy change must be taken into consideration because the entropy considerably decreases or increases.

In this case, Gibbs energy ( $G_{sol}^o$ ) is evaluated as follows:

$$\begin{aligned} G_{sol}^o &= H_0 - T(S_r^o + S_v^o + S_t^o) \\ &= E^T + P\Delta V - T(S_r^o + S_v^o + S_t^o) \\ &= E_{sol} + E_{therm} - T(S_r^o + S_v^o + S_t^o) \end{aligned}$$

where  $\Delta V$  is 0 in solution,  $E_{therm}$  is the thermal correction by translational, vibrational, and rotational movement, and  $S_r^o$ ,  $S_v^o$ , and  $S_t^o$  are rotational, vibrational, and translational entropies, respectively. In general, the Sackur-Tetrode equation is used to evaluate translational entropy  $S_t^o$ . In solution, however, the usual Sackur-Tetrode equation cannot be directly applied to the evaluation of  $S_t^o$ , because the translation movement is suppressed very much in solution. In this context, the translational entropy was corrected with the method developed by Whitesides et al.,<sup>4</sup> where the rotational entropy was evaluated in a normal manner. Thermal correction and entropy contributions of vibration movements to the Gibbs energy were evaluated with the frequencies calculated at 393.15 K and 0.8 MPa.

## 2. Crystallographic data and structure refinements

**Table S1** Crystallographic data and structure refinement of V-Cd-MOF

| Name                                             | V-Cd-MOF                                                                                            |
|--------------------------------------------------|-----------------------------------------------------------------------------------------------------|
| Empirical formula                                | C <sub>98</sub> H <sub>114</sub> N <sub>28</sub> O <sub>75</sub> Cl <sub>2</sub> V <sub>30</sub> Cd |
| Formula weight                                   | 4595.67                                                                                             |
| Temperature (K)                                  | 296                                                                                                 |
| Wave length (Å)                                  | 0.71073                                                                                             |
| Crystal system                                   | monoclinic                                                                                          |
| Space group                                      | C2/c                                                                                                |
| a (Å)                                            | 46.762(3)                                                                                           |
| b (Å)                                            | 12.8284(9)                                                                                          |
| c (Å)                                            | 29.674(2)                                                                                           |
| α (deg)                                          | 90                                                                                                  |
| β (deg)                                          | 121.786(2)                                                                                          |
| γ (deg)                                          | 90                                                                                                  |
| Volume (Å <sup>3</sup> )                         | 15131.0(18)                                                                                         |
| Z, Dcalc (Mg/m <sup>3</sup> )                    | 4, 2.017                                                                                            |
| Absorption coefficient (mm <sup>-1</sup> )       | 2.028                                                                                               |
| F (000)                                          | 9080.0                                                                                              |
| Crystal size (mm <sup>3</sup> )                  | 0.22 × 0.21 × 0.21                                                                                  |
| θ range (deg)                                    | 4.416 to 0.17                                                                                       |
| index range (deg)                                | -55 ≤ h ≤ 55, -15 ≤ k ≤ 15, -35 ≤ l ≤ 35                                                            |
| Reflections collected / unique                   | 82167 / 13417 [Rint = 0.1306]                                                                       |
| Data / restraints / parameters                   | 13417 / 66 / 1059                                                                                   |
| Goodness-of-fit on F <sup>2</sup>                | 1.011                                                                                               |
| R1, wR <sub>2</sub> (I > 2σ(I))                  | 0.0482, 0.0990                                                                                      |
| R1, wR <sub>2</sub> (all data)                   | 0.0982, 0.1188                                                                                      |
| Largest diff. peak and hole (e Å <sup>-3</sup> ) | 2.08, -0.56                                                                                         |

$$R_1 = \frac{\sum ||F_o| - |F_c||}{\sum |F_o|} \cdot wR_2 = \left[ \frac{\sum [w(F_o^2 - F_c^2)^2]}{\sum [w(F_o^2)^2]} \right]^{1/2}$$

### 3. PXRD patterns of V-Cd-MOF

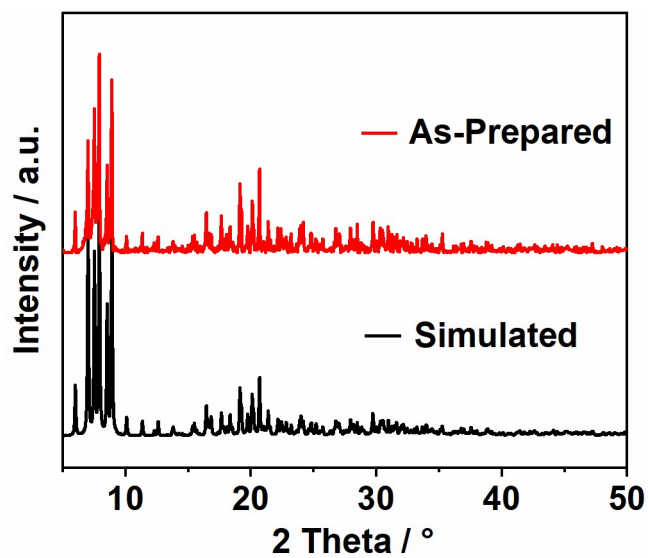

Fig. S1 The PXRD patterns of V-Cd-MOF.

### 4. FTIR spectrum of V-Cd-MOF

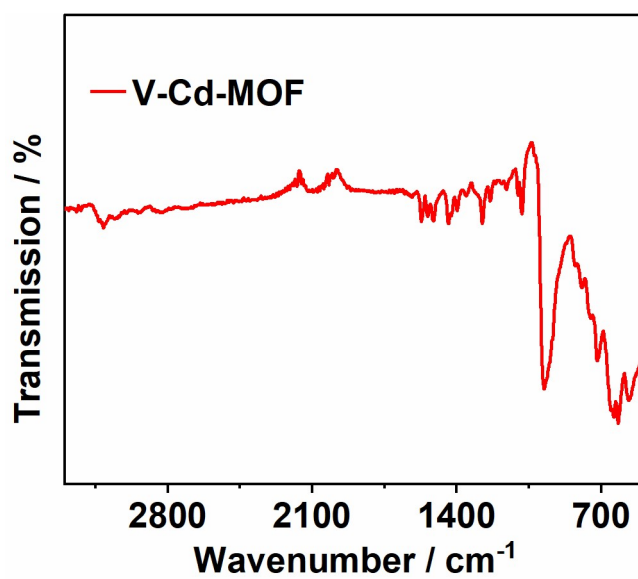

Fig. S2 The FTIR spectrum of V-Cd-MOF.

## 5. TGA curve of V-Cd-MOF

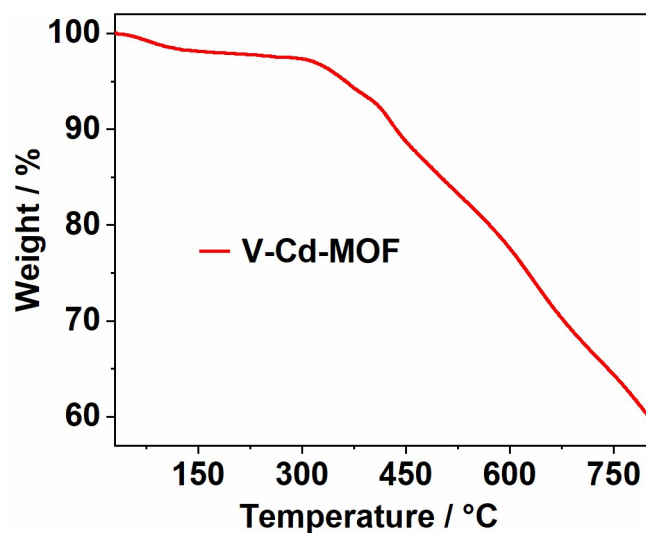

Fig. S3 The TGA curve of V-Cd-MOF.

## 6. The PXRD patterns of the V-Cd-MOF samples recovered after immersion

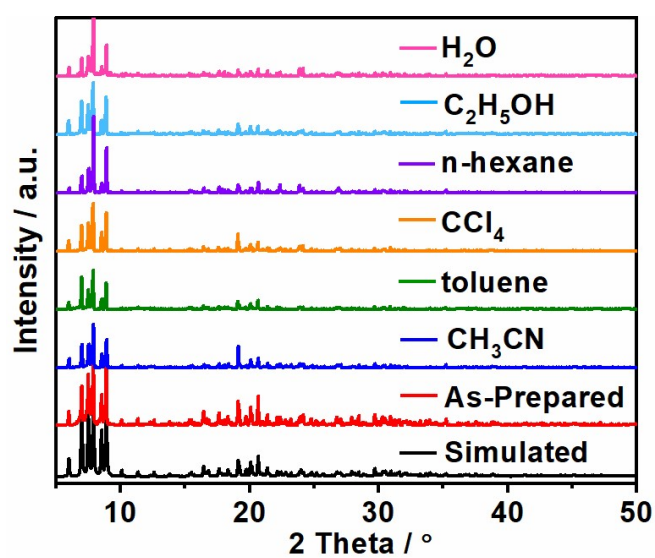

Fig. S4 The PXRD patterns of the V-Cd-MOF samples recovered after solvent immersion at 120 °C for 24 hours.

### 7. Protonated ligand $[H_2bix]^{2+}$ in the V-Cd-MOF

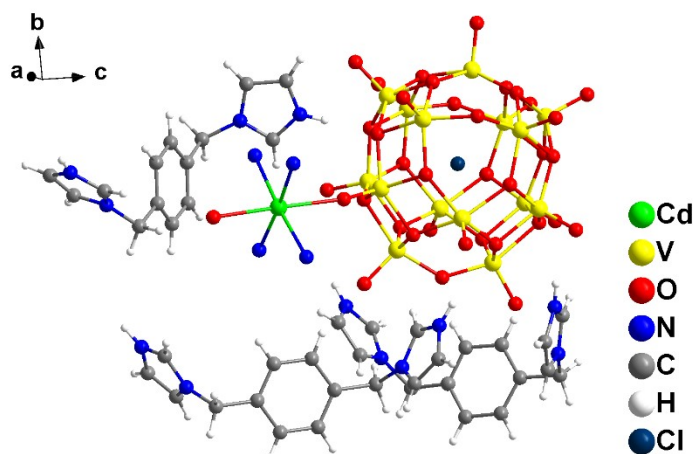

Fig. S5 Protonated ligand  $[H_2bix]^{2+}$  in the V-Cd-MOF.

### 8. The $N_2$ adsorption / desorption isotherms of V-Cd-MOF

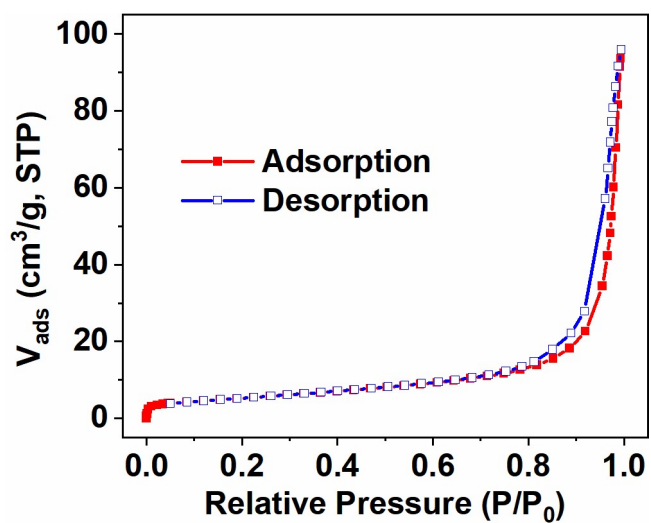

Fig. S6 The  $N_2$  adsorption / desorption isotherms of V-Cd-MOF (measured at 77K,  $P_0 = 101$  kPa).



## 9. The hydrogen bonds in the V-Cd-MOF

**Table S2** The distance between non-hydrogen atoms in the hydrogen bond network of V-Cd-MOF

| Atoms involved | Length (Å) | Atoms involved | Length (Å) |
|----------------|------------|----------------|------------|
| N26···O7       | 2.970      | N8···O36       | 2.906      |
| N25···O15      | 2.750      | N51···O16      | 3.214      |
| N25···O11      | 3.193      | N50···O11      | 2.941      |
| N50···O30      | 2.907      |                |            |

## 10. BVS results.

**Table S3** BVS results for the vanadium ions and cadmium ions in V-Cd-MOF

| Metal site | BVS cacl. | Assigned O.S. | Metal site | BVS cacl. | Assigned O.S. |
|------------|-----------|---------------|------------|-----------|---------------|
| Cd         | 2.11      | 2             | V8         | 4.03      | 4             |
| V1         | 4.39      | 4             | V9         | 4.86      | 5             |
| V2         | 4.48      | 4             | V10        | 4.92      | 5             |
| V3         | 4.50      | 4             | V11        | 4.89      | 5             |
| V4         | 4.10      | 4             | V12        | 5.01      | 5             |
| V5         | 4.82      | 5             | V13        | 4.35      | 4             |
| V6         | 4.38      | 4             | V14        | 4.02      | 4             |
| V7         | 4.79      | 5             | V15        | 4.92      | 5             |

## 11. XPS spectra of V and Cd in V-Cd-MOF

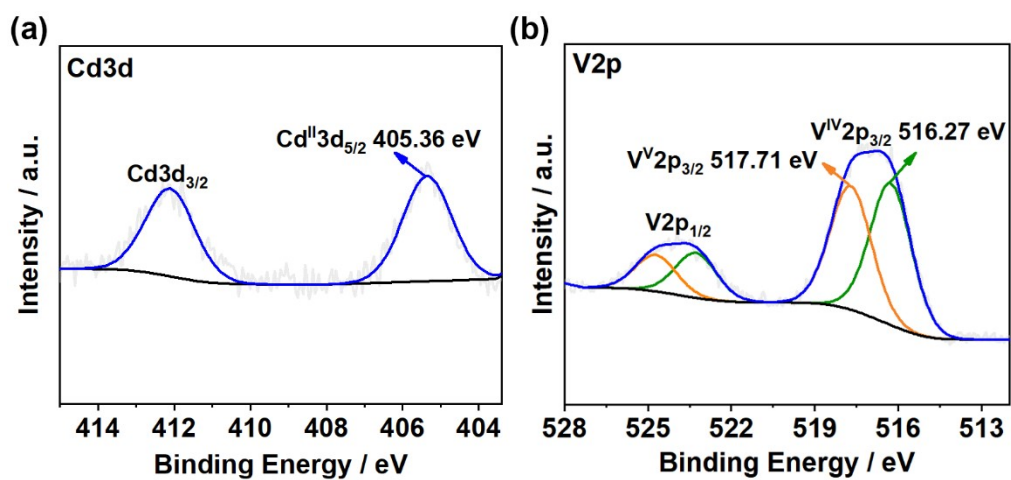

Fig. S7 XPS spectra of Cd and V in V-Cd-MOF.

## 12. TEM image of the ground V-Cd-MOF

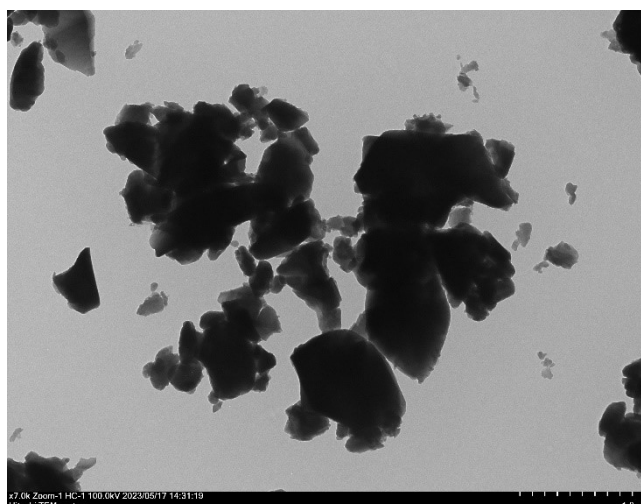

Fig. S8 TEM image of the ground V-Cd-MOF.

### 13. The influences of reaction conditions on the selective oxidation of BA to BAD

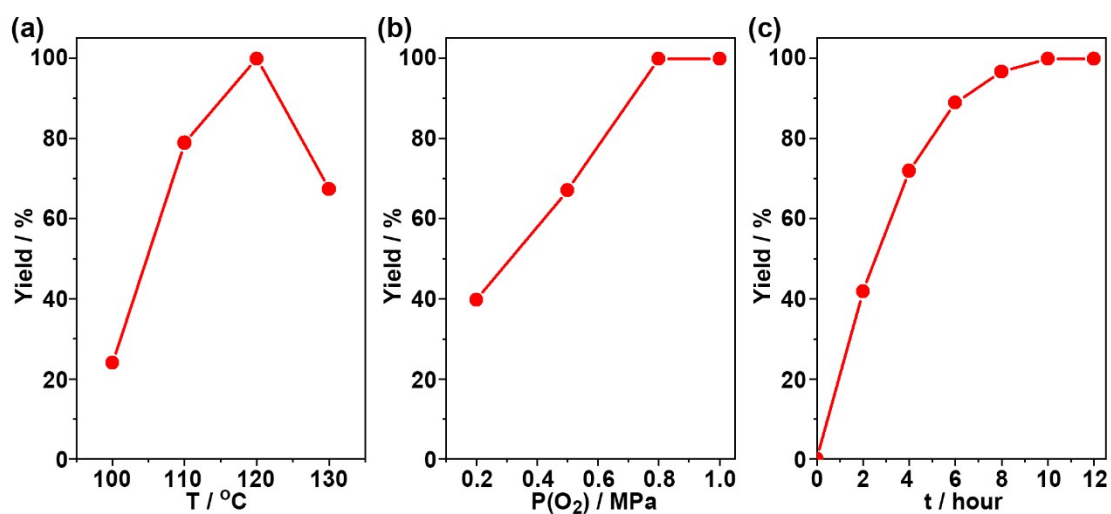

**Fig. S9** The influences of reaction conditions on the selective oxidation of BA to BAD using the **V-Cd-MOF** as catalyst. (a) The effect of reaction temperature. (b) The effect of O<sub>2</sub> pressure. (c) The effect of reaction time. Reaction conditions: BA (0.5 mmol), **V-Cd-MOF** (0.005 mmol, 1% mol), 1-bromododecane (internal standard, 50  $\mu$ L), CH<sub>3</sub>CN (2 mL), O<sub>2</sub> (0.8 MPa) and at 120 °C for 10 hours. The yield was determined by GC analyses.

#### 14. The solvent effect on the selective oxidation of BA to BAD

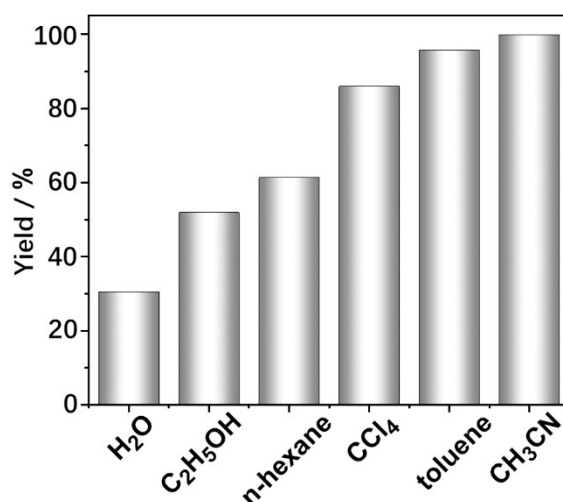

**Fig. S10** The solvent effect on the selective oxidation of BA to BAD using the **V-Cd-MOF** as catalyst. Reaction conditions: BA (0.5 mmol), **V-Cd-MOF** (0.005 mmol, 1% mol), 1-bromododecane (internal standard, 50  $\mu$ L), solvent (2 mL), O<sub>2</sub> (0.8 MPa) and at 120  $^{\circ}$ C for 10 hours. The yield was determined by GC analyses.

#### 15. FTIR spectra and PXRD patterns of recovered V-Cd-MOF

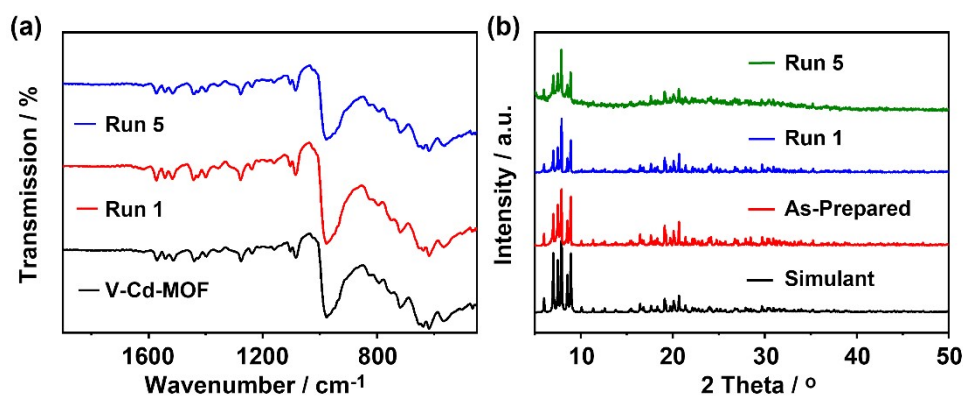

**Fig. S11** (a) FTIR spectra of **V-Cd-MOF** before and after catalytic uses. (b) PXRD patterns of **V-Cd-MOF** before and after catalytic uses.

## 16. XPS spectra of recovered V-Cd-MOF

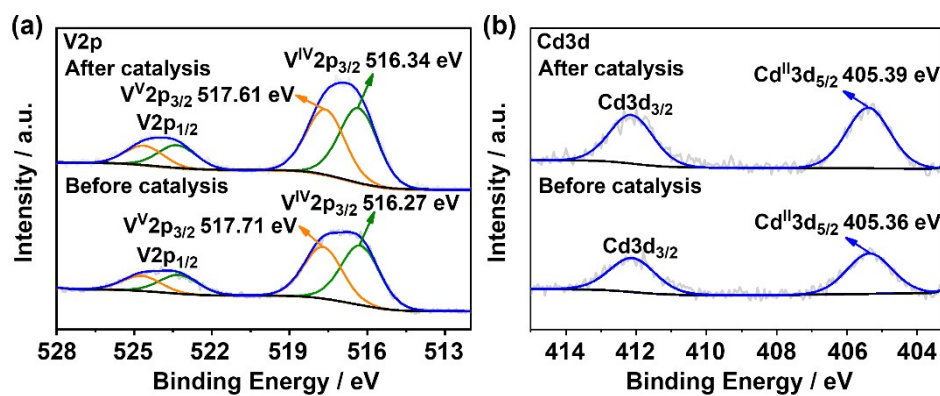

**Fig. S12** XPS results of vanadium ions (a) and cadmium ions (b) of V-Cd-MOF

before and after catalytic uses.

## 17. Comparison of different heterogeneous catalysts used for BA oxidation

**Table S4** Comparison of different heterogeneous catalysts used for BA oxidation

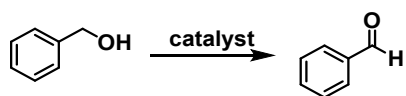

| entry | catalyst                                           | oxidant                       | additive                                  | conv.<br>(%) | sel.<br>(%) | TON  | ref.         |
|-------|----------------------------------------------------|-------------------------------|-------------------------------------------|--------------|-------------|------|--------------|
| 1     | Cu(mIM) <sub>4</sub> V <sub>2</sub> O <sub>6</sub> | H <sub>2</sub> O <sub>2</sub> | —                                         | 98.7         | 100         | 24.1 | [5]          |
| 2     | nano- $\gamma$ -Fe <sub>2</sub> O <sub>3</sub>     | H <sub>2</sub> O <sub>2</sub> | —                                         | 33           | 97          | 32.0 | [6]          |
| 3     | V/SiO <sub>2</sub>                                 | <i>t</i> -BuOOH               | —                                         | >99          | >99         | 20.0 | [7]          |
| 4     | Co <sub>3</sub> O <sub>4</sub> /AC                 | O <sub>2</sub> (0.1 MPa)      | —                                         | 100          | 87.3        | 3.1  | [8]          |
| 5     | Cu(BPYDCDE)<br>(OAc) <sub>2</sub>                  | Air                           | TEMPO                                     | 100          | 100         | 50   | [9]          |
| 6     | Cu <sub>3</sub> (BTC) <sub>2</sub>                 | O <sub>2</sub> (0.1 MPa)      | TEMPO/<br>Na <sub>2</sub> CO <sub>3</sub> | >99          | >99         | 3.7  | [10]         |
| 7     | Ni(OH) <sub>2</sub>                                | O <sub>2</sub> (0.1 MPa)      | —                                         | 98           | 100         | 0.3  | [11]         |
| 8     | <b>V-Cd-MOF</b>                                    | O <sub>2</sub> (0.8 MPa)      | —                                         | >99          | 100         | 100  | this<br>work |

Turnover number (TON) = mol of product / mol of catalyst

18. The coordination mode of Cd in Cd(Inic)<sub>2</sub> and the PXRD patterns of Cd(Inic)<sub>2</sub>·0.5 DMF

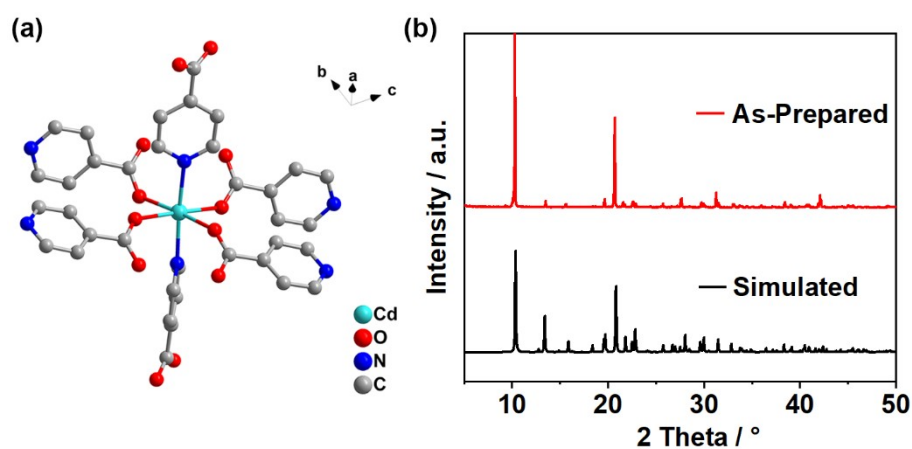

**Fig. S13** (a) The coordination mode of Cd in Cd(Inic)<sub>2</sub>. (b) The PXRD patterns of Cd(Inic)<sub>2</sub>·0.5 DMF.

19. The structure of {V<sup>IV</sup><sub>16</sub>V<sup>V</sup><sub>18</sub>O<sub>82</sub>}<sup>10-</sup> and the PXRD patterns of K<sub>10</sub>{V<sup>IV</sup><sub>16</sub>V<sup>V</sup><sub>18</sub>O<sub>82</sub>}·20H<sub>2</sub>O

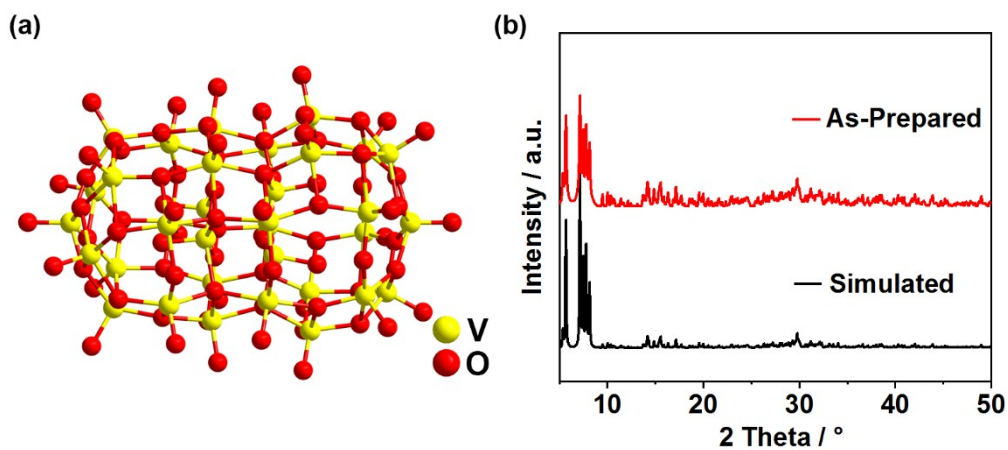

**Fig. S14** (a) The structure of {V<sup>IV</sup><sub>16</sub>V<sup>V</sup><sub>18</sub>O<sub>82</sub>}<sup>10-</sup>. (b) The PXRD patterns of K<sub>10</sub>{V<sup>IV</sup><sub>16</sub>V<sup>V</sup><sub>18</sub>O<sub>82</sub>}·20H<sub>2</sub>O (MV-{V<sub>34</sub>}).

## 20. The structure of $\{V_{16}\}$ -MOF and the PXRD patterns of the $\{V_{16}\}$ -MOF

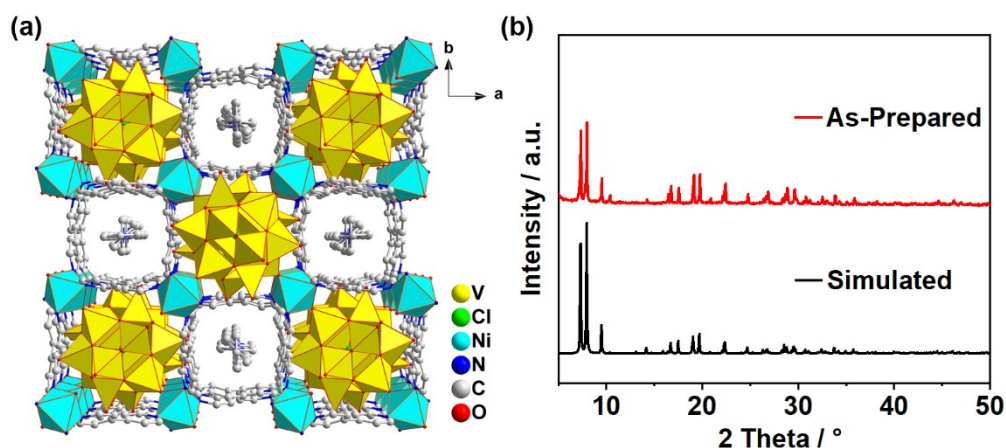

Fig. S15 (a) The structure of  $\{V_{16}\}$ -MOF. (b) The PXRD patterns of the  $\{V_{16}\}$ -MOF.

## 21. Structures of open-shell singlet and nonet $\{V_{15}\}$ clusters

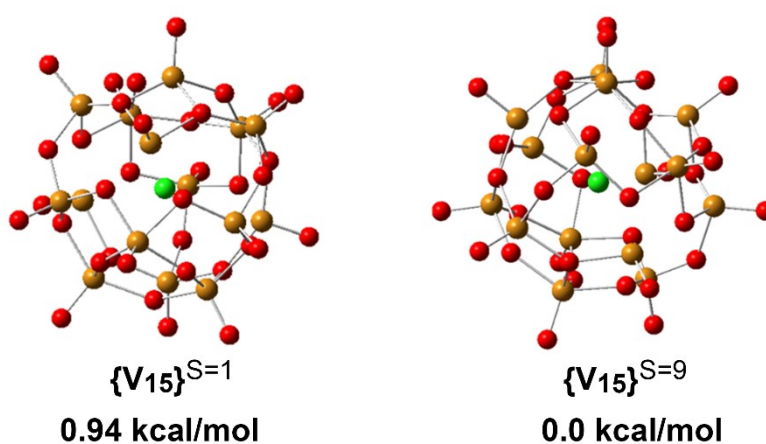

Fig. S16 Structures of open-shell singlet and nonet  $\{V_{15}\}$  clusters. The Gibbs free energies are given in kcal/mol, relative to the most stable nonet  $\{V_{15}\}^{S=9}$  conformation. To identify the stable catalytic activity species, we investigated the different spin states of the  $\{V_{15}\}$  clusters using unrestricted open-shell DFT at the same level, respectively. The nonet state  $\{V_{15}\}$  is proved more stable. (The  $\{V_{15}\}$  mentioned in this paper corresponded triplet  $\{V_{15}\}^{S=9}$ ).



## 22. Assessing the possible conformation of a $\{V_{15}\}$ -bound BA molecule

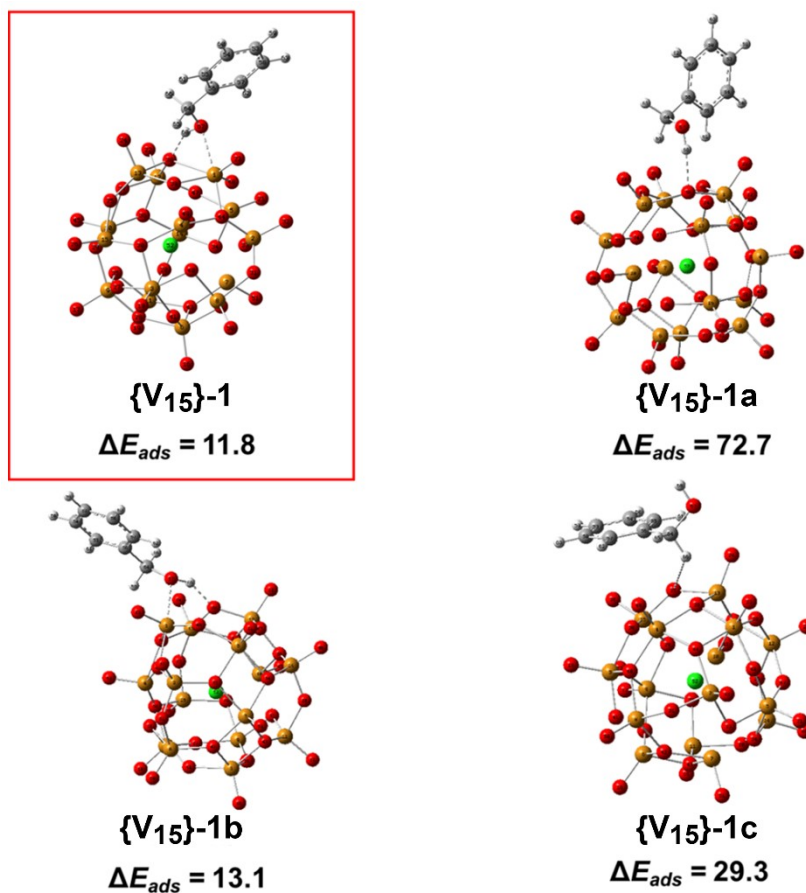

**Fig. S17** Assessing the possible conformation of a  $\{V_{15}\}$ -bound BA molecule. The Gibbs free energies are given in kcal/mol. White, gray, red, green and yellow spheres represent H, C, O, Cl and V atoms, respectively.

### 23. $^1\text{H-NMR}$ spectra of the isolated aldehydes

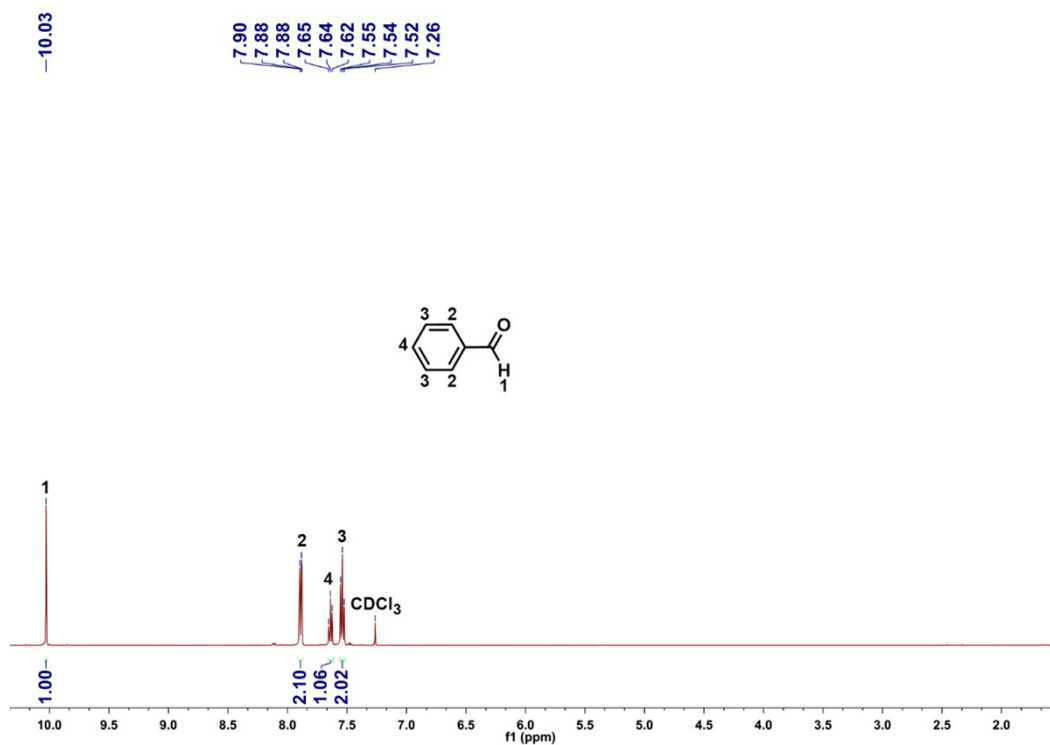

benzaldehyde. Light yellow oil.  $^1\text{H-NMR}$  (400 MHz,  $\text{CDCl}_3$ ).

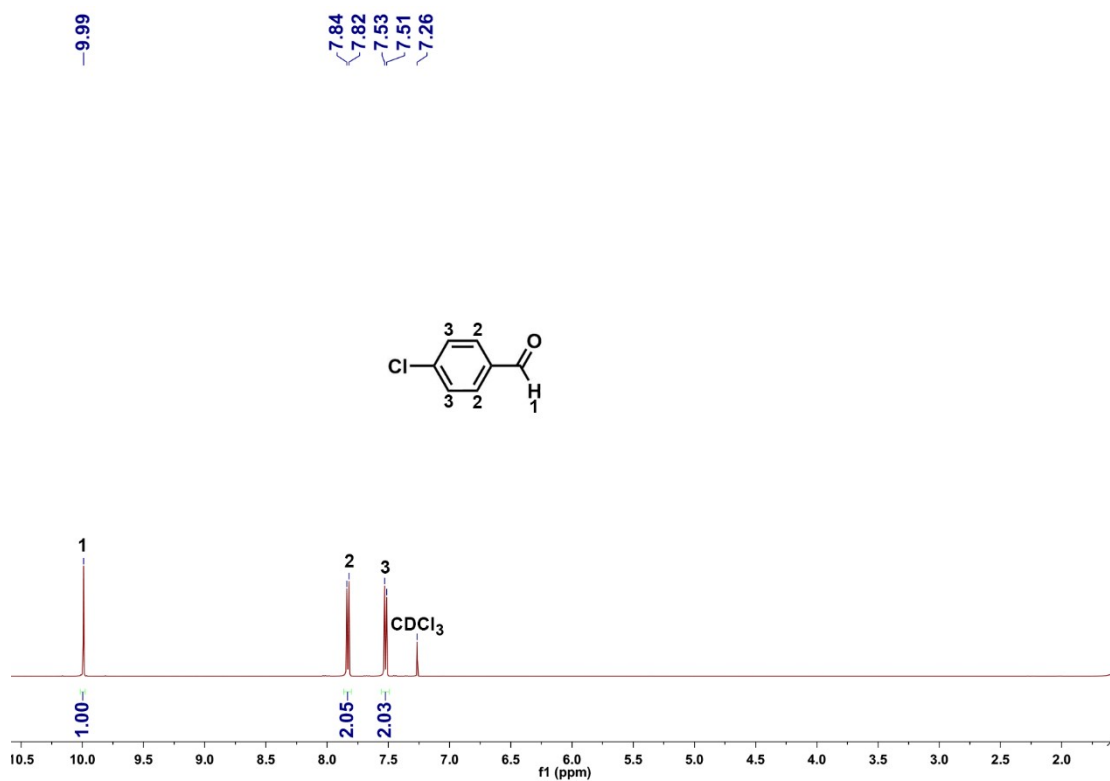

4-chlorobenzaldehyde. Light yellow solid.  $^1\text{H-NMR}$  (400 MHz,  $\text{CDCl}_3$ ).

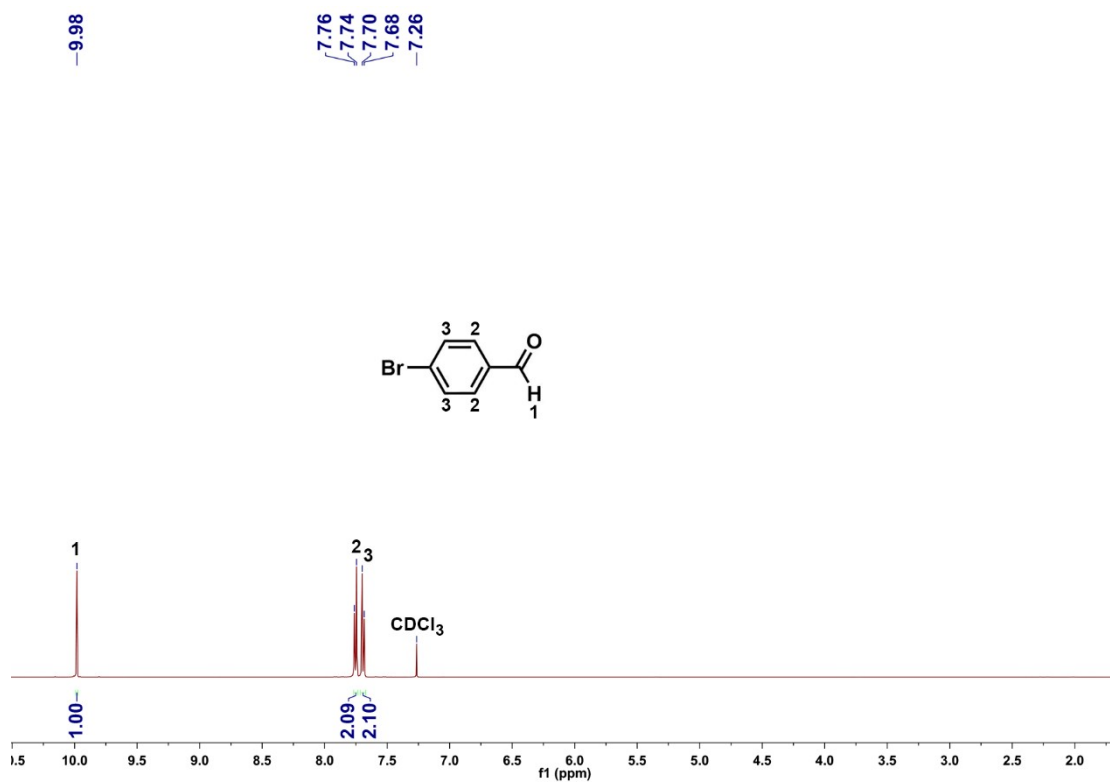

**4-bromobenzaldehyde.** Light yellow solid. <sup>1</sup>H-NMR (400 MHz, CDCl<sub>3</sub>).

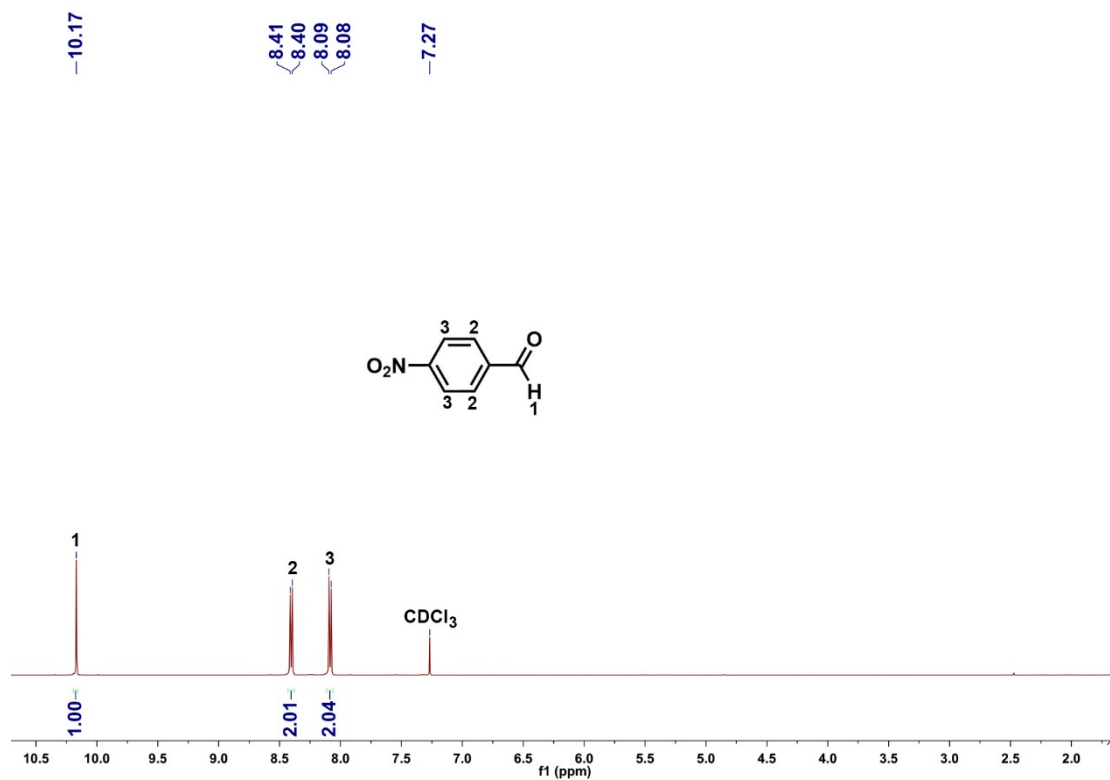

**4-nitrobenzaldehyde.** Yellow solid. <sup>1</sup>H-NMR (400 MHz, CDCl<sub>3</sub>).

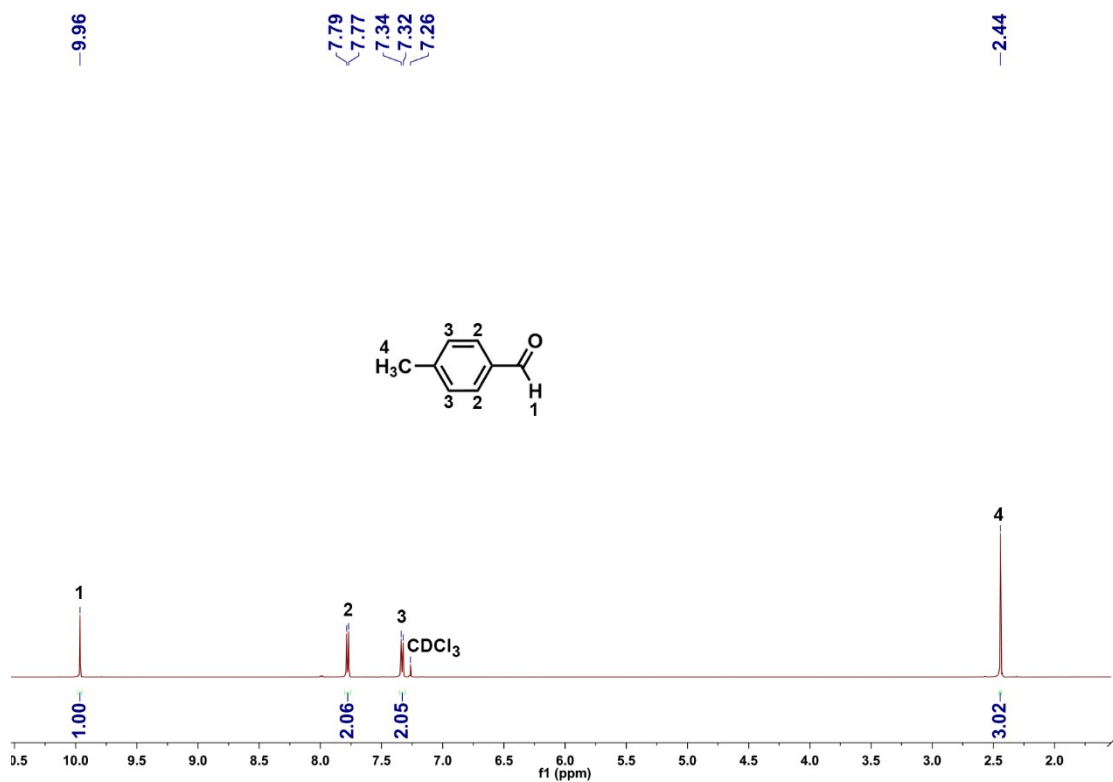

**4-methylbenzaldehyde.** Light yellow oil. <sup>1</sup>H-NMR (400 MHz, CDCl<sub>3</sub>).

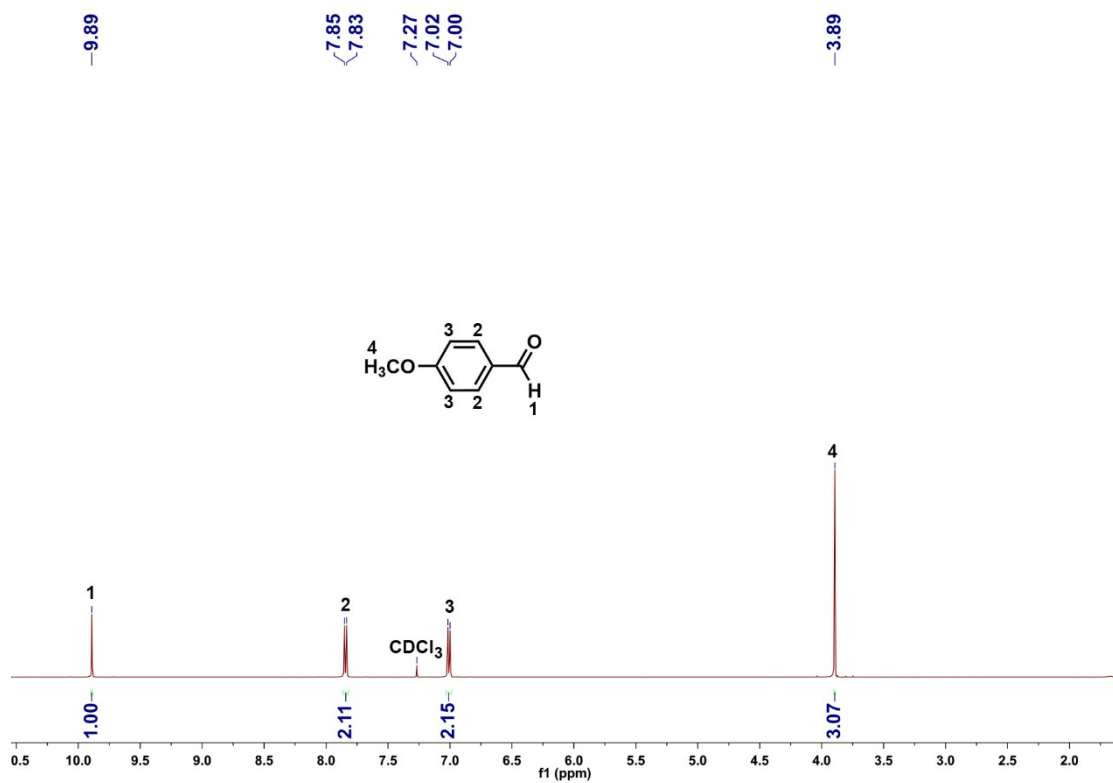

**4-methoxybenzaldehyde.** Light yellow oil. <sup>1</sup>H-NMR (400 MHz, CDCl<sub>3</sub>).

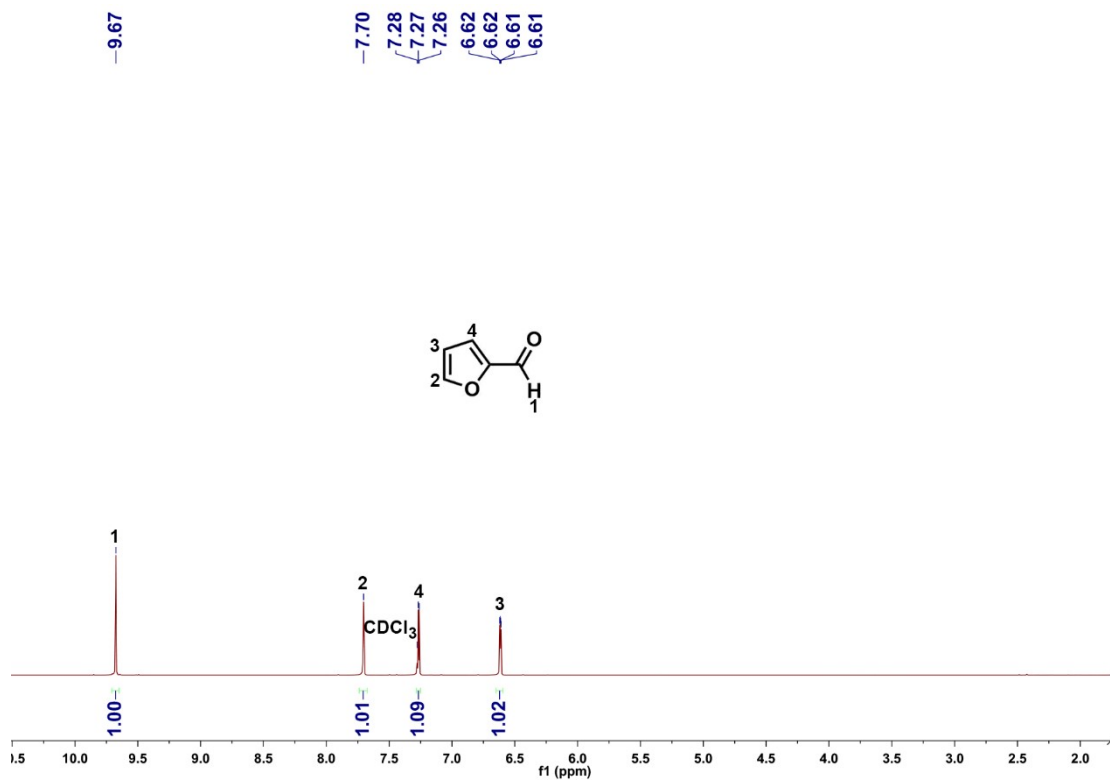

**2-furaldehyde.** Yellow oil.  $^1\text{H-NMR}$  (400 MHz,  $\text{CDCl}_3$ ).

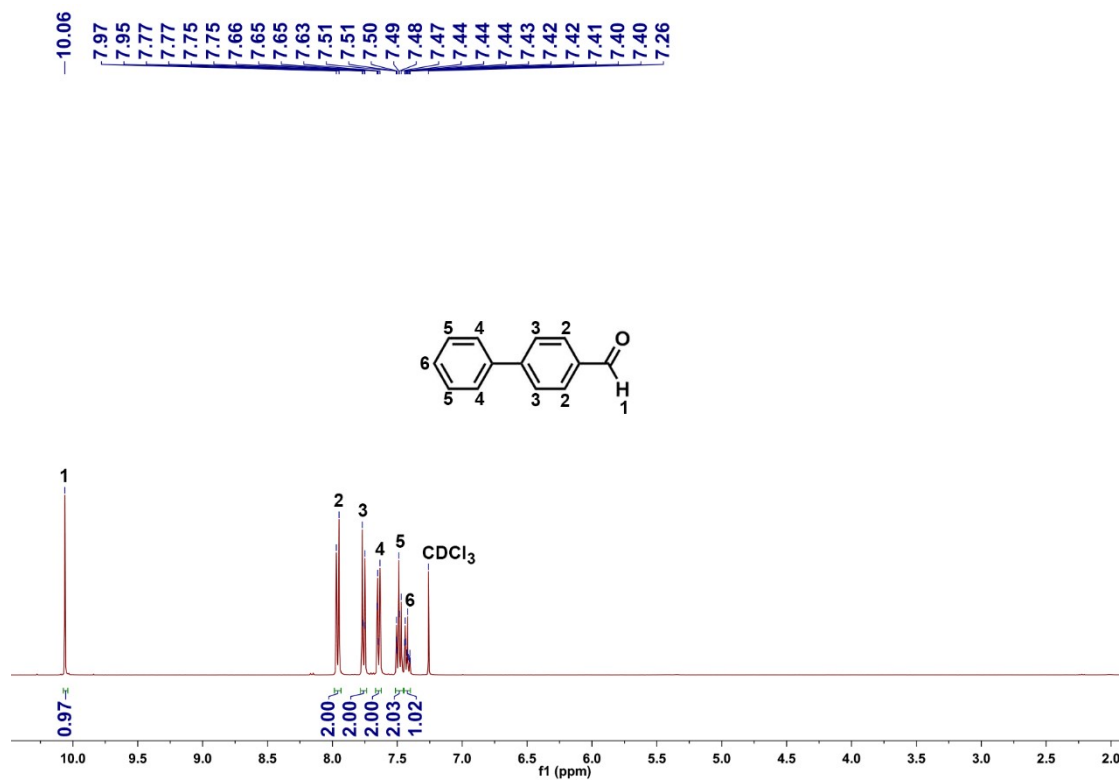

**4-phenylbenzaldehyde.** White solid.  $^1\text{H-NMR}$  (400 MHz,  $\text{CDCl}_3$ ).

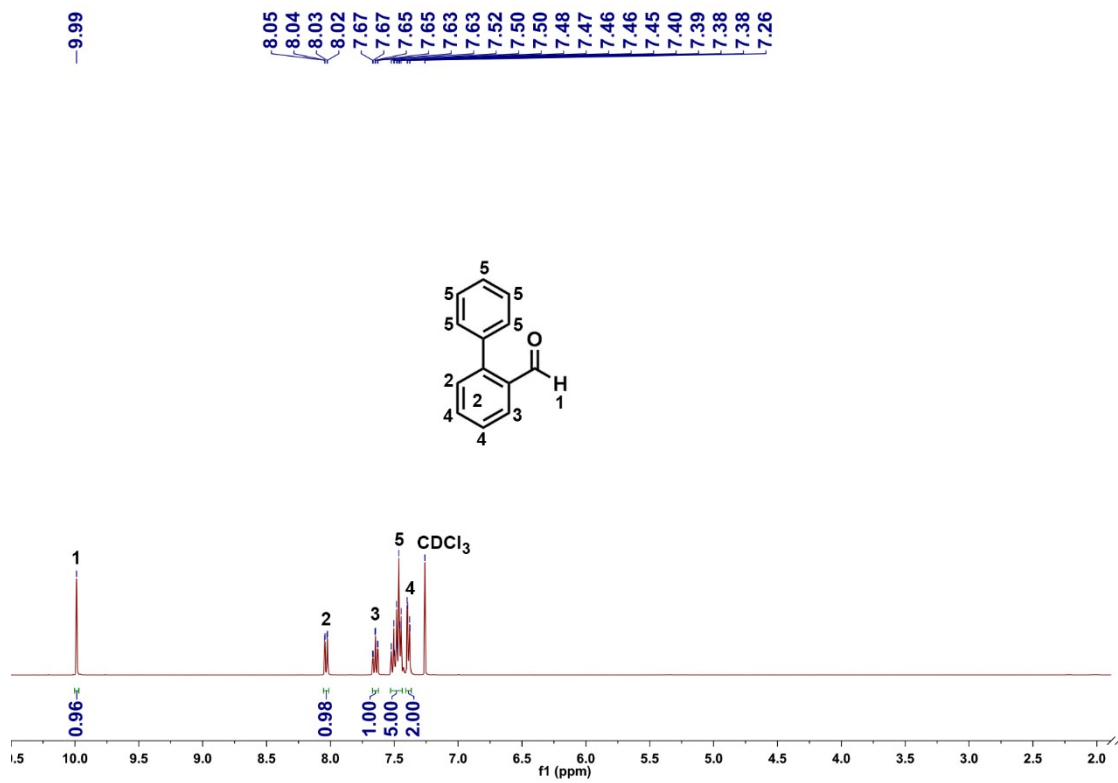

**2-phenylbenzaldehyde.** White solid.  $^1\text{H-NMR}$  (400 MHz,  $\text{CDCl}_3$ ).

**24. Selected bond lengths [Å] and angles [deg] for V-Cd-MOF**

| V-Cd-MOF                 |          |                          |          |
|--------------------------|----------|--------------------------|----------|
| Cd(1)-O(1)               | 2.366(4) | Cd(1)-O(1) <sup>#1</sup> | 2.366(4) |
| Cd(1)-N(1) <sup>#2</sup> | 2.304(5) | Cd(1)-N(1) <sup>#3</sup> | 2.304(5) |
| Cd(1)-N(2)               | 2.322(5) | Cd(1)-N(2) <sup>#1</sup> | 2.322(5) |
| V(1)-O(1)                | 1.614(4) | V(1)-O(13)               | 1.914(4) |
| V(1)-O(26)               | 1.893(4) | V(1)-O(27)               | 1.913(4) |
| V(1)-O(28)               | 1.936(4) | V(2)-O(4)                | 1.600(4) |
| V(2)-O(5)                | 1.815(4) | V(2)-O(13)               | 2.055(4) |
| V(2)-O(20)               | 1.906(4) | V(2)-O(28)               | 1.900(4) |
| V(3)-O(5)                | 1.806(4) | V(3)-O(19)               | 1.908(4) |
| V(3)-O(21)               | 1.887(4) | V(3)-O(31)               | 1.599(4) |
| V(3)-O(32)               | 2.084(4) | V(4)-O(14)               | 1.977(5) |
| V(4)-O(20)               | 1.964(4) | V(4)-O(21)               | 1.968(4) |
| V(4)-O(22)               | 1.982(4) | V(4)-O(30)               | 1.589(4) |
| V(5)-O(7)                | 1.599(4) | V(5)-O(21)               | 1.915(4) |
| V(5)-O(22)               | 1.883(5) | V(5)-O(23)               | 1.880(4) |
| V(5)-O(32)               | 1.920(4) | V(6)-O(9)                | 1.605(4) |
| V(6)-O(10)               | 1.855(4) | V(6)-O(22)               | 1.911(4) |
| V(6)-O(23)               | 2.025(4) | V(6)-O(24)               | 1.908(4) |
| V(7)-O(8)                | 1.597(4) | V(7)-O(23)               | 1.854(4) |
| V(7)-O(24)               | 1.914(4) | V(7)-O(29)               | 1.950(4) |

|                                |          |                                |           |
|--------------------------------|----------|--------------------------------|-----------|
| V(7)-O(33)                     | 1.903(4) | V(8)-O(15)                     | 2.006(4)  |
| V(8)-O(24)                     | 1.968(4) | V(8)-O(25)                     | 1.955(4)  |
| V(8)-O(29)                     | 1.964(4) | V(8)-O(34)                     | 1.602(4)  |
| V(9)-O(10)                     | 1.757(4) | V(9)-O(11)                     | 1.604(4)  |
| V(9)-O(12)                     | 2.047(4) | V(9)-O(14)                     | 1.898(4)  |
| V(9)-O(15)                     | 1.921(4) | V(10)-O(16)                    | 1.746(4)  |
| V(10)-O(17)                    | 1.602(4) | V(10)-O(18)                    | 1.903(4)  |
| V(10)-O(29)                    | 1.879(4) | V(10)-O(33)                    | 2.093(4)  |
| V(11)-O(3)                     | 1.593(4) | V(11)-O(12)                    | 1.909(4)  |
| V(11)-O(15)                    | 1.956(4) | V(11)-O(25)                    | 1.896(4)  |
| V(11)-O(26)                    | 1.825(4) | V(12)-O(2)                     | 1.585(4)  |
| V(12)-O(12)                    | 1.866(4) | V(12)-O(13)                    | 1.828(4)  |
| V(12)-O(14)                    | 1.940(4) | V(12)-O(20)                    | 1.914(4)  |
| V(13)-O(16)                    | 1.898(4) | V(13)-O(25)                    | 1.907(4)  |
| V(13)-O(26)                    | 2.022(4) | V(13)-O(27)                    | 1.907(4)  |
| V(13)-O(35)                    | 1.595(4) | V(14)-O(18)                    | 1.985(4)  |
| V(14)-O(19)                    | 1.960(4) | V(14)-O(27)                    | 1.975(4)  |
| V(14)-O(28)                    | 1.973(4) | V(14)-O(36)                    | 1.603(4)  |
| V(15)-O(6)                     | 1.599(4) | V(15)-O(18)                    | 1.954(4)  |
| V(15)-O(19)                    | 1.909(4) | V(15)-O(32)                    | 1.839(4)  |
| V(15)-O(33)                    | 1.858(4) |                                |           |
| O(1) <sup>#1</sup> -Cd(1)-O(1) | 178.4(2) | N(1) <sup>#2</sup> -Cd(1)-O(1) | 95.85(16) |



|                                |            |                                              |            |
|--------------------------------|------------|----------------------------------------------|------------|
| N(1) <sup>#3</sup> -Cd(1)-O(1) | 83.08(16)  | N(1) <sup>#2</sup> -Cd(1)-N(2) <sup>#1</sup> | 175.90(18) |
| O(1)-V(1)-O(13)                | 106.0(2)   | O(1)-V(1)-O(27)                              | 110.69(19) |
| O(13)-V(1)-O(28)               | 83.06(17)  | O(4)-V(2)-O(5)                               | 102.8(2)   |
| O(5)-V(2)-O(20)                | 91.15(19)  | O(28)-V(2)-O(20)                             | 135.76(17) |
| O(5)-V(3)-O(19)                | 91.04(18)  | O(19)-V(3)-O(32)                             | 78.98(16)  |
| O(32)-V(3)-O(31)               | 101.7(2)   | O(14)-V(4)-O(22)                             | 93.57(18)  |
| O(22)-V(4)-O(21)               | 77.90(18)  | O(21)-V(4)-O(30)                             | 107.0(2)   |
| O(7)-V(5)-O(21)                | 107.5(2)   | O(21)-V(5)-O(32)                             | 82.56(18)  |
| O(32)-V(5)-O(23)               | 88.51(18)  | O(9)-V(6)-O(10)                              | 102.8(2)   |
| O(10)-V(6)-O(22)               | 88.96(19)  | O(22)-V(6)-O(24)                             | 137.64(17) |
| O(8)-V(7)-O(29)                | 109.85(19) | O(29)-V(7)-O(24)                             | 79.27(16)  |
| O(24)-V(7)-O(33)               | 142.81(17) | O(24)-V(8)-O(15)                             | 93.79(16)  |
| O(15)-V(8)-O(34)               | 103.4(2)   | O(34)-V(8)-O(25)                             | 104.01(19) |
| O(10)-V(9)-O(12)               | 154.86(18) | O(12)-V(9)-O(14)                             | 77.25(18)  |
| O(14)-V(9)-O(11)               | 110.3(2)   | O(16)-V(10)-O(18)                            | 92.94(18)  |
| O(18)-V(10)-O(33)              | 76.32(16)  | O(33)-V(10)-O(29)                            | 77.13(16)  |
| O(3)-V(11)-O(15)               | 104.6(2)   | O(15)-V(11)-O(12)                            | 80.14(17)  |
| O(12)-V(11)-O(26)              | 93.44(18)  | O(2)-V(12)-O(12)                             | 108.1(2)   |
| O(12)-V(12)-O(20)              | 142.99(18) | O(20)-V(12)-O(14)                            | 79.11(18)  |
| O(16)-V(13)-O(25)              | 88.41(17)  | O(25)-V(13)-O(27)                            | 136.94(16) |
| O(27)-V(13)-O(35)              | 111.7(2)   | O(19)-V(14)-O(18)                            | 77.25(17)  |
| O(18)-V(14)-O(28)              | 147.90(16) | O(28)-V(14)-O(27)                            | 77.53(16)  |

|                   |           |                   |           |
|-------------------|-----------|-------------------|-----------|
| O(6)-V(15)-O(18)  | 105.3(2)  | O(18)-V(15)-O(19) | 79.20(17) |
| O(19)-V(15)-O(32) | 85.40(18) |                   |           |

---

#1 -X, +Y, 1/2-Z; #2 -X, -1+Y, 1/2-Z; #3 +X, -1+Y, +Z.

## 25. Reference

- 1 Weigend, F.; Ahlrichs, R., Balanced basis sets of split valence, triple zeta valence and quadruple zeta valence quality for H to Rn: Design and assessment of accuracy. *Phys. Chem. Chem. Phys.* **2005**, *7*, 3297-3305.
- 2 Fukui, K., Formulation of the reaction coordinate. *J. Phys. Chem.* **1970**, *74*, 4161-4163.
- 3 Peintinger, M. F.; Oliveira, D. V.; Bredow, T., Consistent Gaussian basis sets of triple-zeta valence with polarization quality for solid-state calculations. *J. Comput. Chem.* **2013**, *34*, 451-459.
- 4 Mammen, M.; Shakhnovich, E. I.; Deutch, J. M.; Whitesides, G. M., Estimating the entropic cost of self-assembly of multiparticle hydrogen-bonded aggregates based on the cyanuric acid-melamine lattice. *J. Org. Chem.* **1998**, *63*, 3821-3830.
- 5 Li, J.; Huang, X.; Yang, S.; Xu, Y.; Hu, C., Controllable synthesis, characterization, and catalytic properties of three inorganic-organic hybrid copper vanadates in the highly selective oxidation of sulfides and alcohols. *Cryst. Growth Des.* **2015**, *15*, 1907-1914.
- 6 Shi, F.; Tse, M. K.; Pohl, M.-M.; Brückner, A.; Zhang, S.; Beller, M., Tuning catalytic activity between homogeneous and heterogeneous catalysis: Improved activity and selectivity of free nano-Fe<sub>2</sub>O<sub>3</sub> in selective oxidations. *Angew. Chem. Int. Ed.* **2007**, *46*, 8866-8868.
- 7 Rout, L.; Nath, P.; Punniyamurthy, T., Vanadium-catalyzed selective oxidation of alcohols to aldehydes and ketones with *tert*-butyl hydroperoxide. *Adv. Synth. Catal.* **2007**, *349*, 846-848.
- 8 Zhu, J.; Kailasam, K.; Fischer, A.; Thomas, A., Supported cobalt oxide nanoparticles as catalyst for aerobic oxidation of alcohols in liquid phase. *ACS Catal.* **2011**, *1*, 342-347.
- 9 Mei, Q.; Liu, H.; Yang, Y.; Liu, H.; Li, S.; Zhang, P.; Han, B., Base-free aerobic oxidation of alcohols over copper-based complex under ambient condition. *ACS Sustainable Chem. Eng.* **2018**, *6*, 2362-2369.
- 10 Peng, L.; Zhang, J.; Xue, Z.; Han, B.; Sang, X.; Liu, C.; Yang, G., Highly mesoporous metal-organic framework assembled in a switchable solvent. *Nature Commun.* **2014**, *5*, 4465.
- 11 Ji, H. B.; Wang, T. T.; Zhang, M. Y.; Chen, Q. L.; Gao, X. N., Green oxidation of alcohols by a reusable nickel catalyst in the presence of molecular oxygen. *React. Kinet. Catal. Lett.* **2007**, *90*, 251-257.
